# Supplementary material for: Clonal haematopoiesis is not prevalent in survivors of childhood cancer
Source: PubMed Central journal article supplement (PMC6001539; doi:10.1111/bjh.14630), 2017-04-03
Supplement: BJH-181-537-s001.pdf [file BJH-181-537-s001.pdf]

**Table SI | Patient Characteristics**

| <b>Study ID</b> | <b>Sex</b> | <b>Diagnosis</b> | <b>Age at diagnosis</b> | <b>Months since cytotoxic treatment</b> |
|-----------------|------------|------------------|-------------------------|-----------------------------------------|
| 1               | F          | NB               | 15.4                    | 64.3                                    |
| 2               | M          | RMS              | 11.1                    | 21.7                                    |
| 3               | F          | ALL              | 5.7                     | 132.4                                   |
| 4               | NA         | ALL              | NA                      | NA                                      |
| 5*              | F          | ALL              | 1.1                     | 106.4                                   |
| 6               | F          | ALL              | 6.1                     | 80.3                                    |
| 7               | M          | NB               | 6.3                     | 231.9                                   |
| 8§              | M          | NHL              | 4.7                     | 176.2                                   |
| 9               | f          | ALL              | 1.7                     | 52.6                                    |
| 10§             | M          | ALL              | 6.9                     | 298.2                                   |
| 11              | F          | GCT              | 9.3                     | 25.9                                    |
| 12              | M          | RMS              | 6.0                     | 102.9                                   |
| 13              | F          | NHL              | 7.1                     | 103.9                                   |
| 14              | M          | ALL              | 6.9                     | 177.4                                   |
| 15              | F          | NHL              | 9.4                     | 80.1                                    |
| 16              | M          | NB               | 0.6                     | 94.0                                    |
| 17*             | M          | LL               | 5.8                     | 55.4                                    |
| 18              | M          | HL               | 14.8                    | 136.6                                   |
| 19              | M          | WT               | 0.8                     | 57.3                                    |
| 20              | M          | RMS              | 3.1                     | 47.6                                    |
| 21              | F          | ALL              | 9.1                     | 35.7                                    |
| 22              | M          | HL               | 10.9                    | 43.5                                    |
| 23              | M          | ALL              | 4.0                     | 49.5                                    |
| 24              | M          | HL               | 14.2                    | 42.5                                    |
| 25              | M          | HB               | 0.3                     | 112.9                                   |
| 26*             | M          | ALL              | 0.6                     | 81.1                                    |
| 27              | M          | HL               | 7.1                     | 86.2                                    |
| 28              | M          | GCT              | 15.4                    | 26.7                                    |
| 29              | M          | RMS              | 5.8                     | 76.2                                    |
| 30§             | M          | NHL              | 15.5                    | 46.6                                    |
| 31              | M          | HL               | 25.4                    | 48.5                                    |
| 32§             | M          | ESFT             | 4.6                     | 141.5                                   |
| 33              | M          | LL               | 9.3                     | 112.9                                   |
| 34              | F          | ESFT             | 3.3                     | 74.3                                    |
| 35*             | M          | NB               | 2.3                     | 102.9                                   |
| 36              | M          | NHL              | 2.0                     | 46.4                                    |
| 37              | M          | NB               | 3.4                     | 166.4                                   |
| 38              | F          | NB               | 1.7                     | 124.8                                   |
| 39*             | M          | LL               | 3.2                     | 112.9                                   |
| 40§             | M          | NB               | 0.5                     | 289.3                                   |
| 41              | F          | WT               | 3.1                     | 105.9                                   |
| 42              | M          | NB               | 0.9                     | 268.4                                   |
| 43              | F          | NB               | 0.6                     | 238.8                                   |
| 44              | M          | NHL              | 5.8                     | 183.2                                   |

|     |   |       |      |       |
|-----|---|-------|------|-------|
| 45  | M | RMS   | 8.4  | 192.2 |
| 46  | M | NRSTS | 4.3  | 105.9 |
| 47  | M | ALL   | 3.0  | 58.3  |
| 48  | M | ALL   | 3.9  | 35.7  |
| 49  | M | NB    | 5.5  | NA    |
| 50  | F | ESFT  | 13.4 | 69.2  |
| 51* | M | ALL   | 4.7  | 89.1  |
| 52  | F | CCA   | 12.8 | 41.5  |
| 53  | M | NB    | 4.0  | 73.3  |
| 54  | F | WT    | 4.8  | 63.4  |
| 55  | M | HL    | 15.3 | 46.4  |
| 56* | M | ALL   | 1.5  | 44.5  |
| 57  | M | NPC   | 15.9 | 35.4  |
| 58  | F | NHL   | 8.7  | 25.7  |
| 59  | M | ALL   | 4.5  | 59.4  |
| 60  | M | ALL   | 3.6  | 35.9  |
| 61  | M | NB    | 5.8  | 34.5  |
| 62  | M | NHL   | 2.6  | 59.3  |
| 63  | M | NHL   | 9.1  | 62.4  |
| 64  | F | RMS   | 3.0  | 80.1  |
| 65  | F | NB    | 0.3  | 138.6 |
| 66  | F | RMS   | 1.1  | 45.4  |
| 67  | F | ALL   | 2.4  | 54.4  |
| 68  | M | NHL   | 3.7  | 212.9 |
| 69  | F | NRSTS | 11.0 | 38.1  |
| 70  | M | NB    | 0.4  | 45.4  |
| 71  | F | LCH   | 3.7  | 88.1  |
| 72* | F | LCH   | 3.1  | 69.2  |
| 73  | F | WT    | 3.8  | 142.7 |
| 74  | F | GCT   | 0.0  | 131.8 |
| 75  | M | GCT   | 15.4 | NA    |
| 76§ | F | WT    | 4.9  | 96.1  |
| 77  | F | ALL   | 8.2  | 45.4  |
| 78§ | F | NB    | 1.1  | 39.6  |
| 79  | M | ALL   | 4.5  | 77.2  |
| 80§ | M | NB    | 1.3  | 194.1 |
| 81  | M | ALL   | 3.3  | 48.5  |
| 82  | F | NB    | 0.3  | 75.2  |
| 83  | M | ALL   | 3.0  | 75.2  |
| 84  | M | ESFT  | 10.7 | 100.0 |

RMS, rhabdomyosarcoma; ALL, acute lymphoblastic leukaemia; NB, neuroblastoma; NHL, non-Hodgkin lymphoma; GCT, germ cell tumour; LL, lymphoblastic lymphoma; HL, Hodgkin lymphoma; WT, Wilms' tumour; ESFT, Ewing sarcoma; NRSTS, non-rhabdomyosarcoma soft tissue sarcoma; NPC, nasopharyngeal sarcoma; CCA, choriocarcinoma; LCH, Langerhans cell histiocytosis; NA, no data. Patients who received a haematopoietic stem cell transplant (HSCT) are indicated with the symbols \* (allogeneic HSCT) or § (autologous HSCT).

**Table SII | Primer Sequences**

| PLEX | PRIMER NAME                 | GENE   | TARGETED EXON/CODON | PRIMER SEQUENCE3                                              |
|------|-----------------------------|--------|---------------------|---------------------------------------------------------------|
| 1    | ASXL1_exon12_a_F            | ASXL1  | exon12              | ACACTCTTCCCTACACGACGCTCTCCGAT<br>CTGGACCTCGCAGACATTAmAA       |
| 1    | ASXL1_exon12_a_R            | ASXL1  | exon12              | TCGGCATTCTGCTGAACCGCTCTCCGATC<br>TGCTGTAGATCTGACGTACACmUT     |
| 1    | ASXL1_exon12_b_F            | ASXL1  | exon12              | ACACTCTTCCCTACACGACGCTCTCCGAT<br>CTCAGTGGTGATGGTGGTGmAG       |
| 1    | ASXL1_exon12_b_R            | ASXL1  | exon12              | TCGGCATTCTGCTGAACCGCTCTCCGATC<br>TGGCATCTCCTAGCCCAmCT         |
| 1    | ASXL1_exon12_c_F            | ASXL1  | exon12              | ACACTCTTCCCTACACGACGCTCTCCGAT<br>CTCTACTACAGAGGGCTACAGTmUG    |
| 1    | ASXL1_exon12_c_R            | ASXL1  | exon12              | TCGGCATTCTGCTGAACCGCTCTCCGATC<br>TCTTGCTCCTCATCATCACTmUC      |
| 1    | DNMT3A_p.R693C_F            | DNMT3A | p.R693C             | ACACTCTTCCCTACACGACGCTCTCCGAT<br>CTCCTCATGTTCTTGGTGTTTTAT     |
| 1    | DNMT3A_p.R693C_R            | DNMT3A | p.R693C             | TCGGCATTCTGCTGAACCGCTCTCCGATC<br>TTTTTCTCCCCAGGGTATTTG        |
| 1    | IDH1_p.R132H_F              | IDH1   | p.R132H             | ACACTCTTCCCTACACGACGCTCTCCGAT<br>CTTAAATGTGTGTAATATACAGTTAT   |
| 1    | IDH1_p.R132H_R              | IDH1   | p.R132H             | TCGGCATTCTGCTGAACCGCTCTCCGATC<br>TATTATCTGCAAAAATATCCCC       |
| 1    | IDH2_p.R172K_IDH2_p.R140Q_F | IDH2   | p.R172K,<br>p.R140Q | ACACTCTTCCCTACACGACGCTCTCCGAT<br>CTAAGAGGATGGCTAGGCGAGGA      |
| 1    | IDH2_p.R172K_IDH2_p.R140Q_R | IDH2   | p.R172K,<br>p.R140Q | TCGGCATTCTGCTGAACCGCTCTCCGATC<br>TCTCACAGAGTTCAAGCTGAAG       |
| 1    | JAK2_p.V617F_F              | JAK2   | p.V617F             | ACACTCTTCCCTACACGACGCTCTCCGAT<br>CTAGTCTTTCTTTGAAGCAGCAAG     |
| 1    | JAK2_p.V617F_R              | JAK2   | p.V617F             | TCGGCATTCTGCTGAACCGCTCTCCGATC<br>TAGTTTACTGACACCTAGCTG        |
| 1    | KIT_exon17_F                | KIT    | exon17              | ACACTCTTCCCTACACGACGCTCTCCGAT<br>CTTGGTTTTCTTTCTCCTCCAAC      |
| 1    | KIT_exon17_R                | KIT    | exon17              | TCGGCATTCTGCTGAACCGCTCTCCGATC<br>TTCCTTGCAGGACTGTCAAG         |
| 1    | KRAS_p.G12R_F               | KRAS   | p.G12R              | ACACTCTTCCCTACACGACGCTCTCCGAT<br>CTTGTTGGATCATATTCGTCCACA     |
| 1    | KRAS_p.G12R_R               | KRAS   | p.G12R              | TCGGCATTCTGCTGAACCGCTCTCCGATC<br>TAAGTACTGGTGGAGTATTTGA       |
| 1    | NPM1_p.L287fs*13_F          | NPM1   | p.L287fs*13         | ACACTCTTCCCTACACGACGCTCTCCGAT<br>CTTGTTGGAAATTAATACATCTGA     |
| 1    | NPM1_p.L287fs*13_R          | NPM1   | p.L287fs*13         | TCGGCATTCTGCTGAACCGCTCTCCGATC<br>TAAAATTTTTTAACAAATTGTTTAAACT |
| 1    | NRAS_p.G12D_F               | NRAS   | p.G12D              | ACACTCTTCCCTACACGACGCTCTCCGAT<br>CTATGGGTAAAGATGATCCGACAA     |
| 1    | NRAS_p.G12D_R               | NRAS   | p.G12D              | TCGGCATTCTGCTGAACCGCTCTCCGATC<br>TCGCCAATTAACCTGATTACTG       |
| 1    | SF3B1_p.K666N_F             | SF3B1  | p.K666N             | ACACTCTTCCCTACACGACGCTCTCCGAT<br>CTACCCTGTCTCTAAAGAAAAAA      |
| 1    | SF3B1_p.K666N_R             | SF3B1  | p.K666N             | TCGGCATTCTGCTGAACCGCTCTCCGATC<br>TTAGAGCTTTTGTGTTGTAGC        |
| 1    | SF3B1_p.K700E_F             | SF3B1  | p.K700E             | ACACTCTTCCCTACACGACGCTCTCCGAT<br>CTTAGTAATTTAGATTTATGTCGCC    |
| 1    | SF3B1_p.K700E_R             | SF3B1  | p.K700E             | TCGGCATTCTGCTGAACCGCTCTCCGATC                                 |

|   |                 |       |         |                                                             |
|---|-----------------|-------|---------|-------------------------------------------------------------|
|   |                 |       |         | TGGCATAGTTAAACCTGTGTTT                                      |
| 1 | SRSF2_p.P95L_F  | SRSF2 | p.P95L  | ACACTCTTTCCTACACGACGCTCTCCGAT<br>CTTGCTTCGCCGCGACCTTTGT     |
| 1 | SRSF2_p.P95L_R  | SRSF2 | p.P95L  | TCGGCATTCTGCTGAACCGCTCTCCGATC<br>TGAGGACGCTATGGATGCCATG     |
| 1 | U2AF1_p.Q157R_F | U2AF1 | p.Q157R | ACACTCTTTCCTACACGACGCTCTCCGAT<br>CTGGGTTGGAAGGAGACATTTAmCT  |
| 1 | U2AF1_p.Q157R_R | U2AF1 | p.Q157R | TCGGCATTCTGCTGAACCGCTCTCCGATC<br>TGAAAAGGCTGTGATTGACTTmGA   |
| 1 | U2AF1_p.S34F_F  | U2AF1 | p.S34F  | ACACTCTTTCCTACACGACGCTCTCCGAT<br>CTCGATCACCTGCCTCACTATTmAT  |
| 1 | U2AF1_p.S34F_R  | U2AF1 | p.S34F  | TCGGCATTCTGCTGAACCGCTCTCCGATC<br>TTTTCAAATTGGAGCATGTCmGT    |
| 2 | PPM1D_exon1_a_F | PPM1D | exon1   | ACACTCTTTCCTACACGACGCTCTCCGAT<br>CTGAGCGCTAGTGTGTmUC        |
| 2 | PPM1D_exon1_a_R | PPM1D | exon1   | TCGGCATTCTGCTGAACCGCTCTCCGATC<br>TGCCTTTCGCCGAGACTmUC       |
| 2 | PPM1D_exon1_c_F | PPM1D | exon1   | ACACTCTTTCCTACACGACGCTCTCCGAT<br>CTGTTCTCCGTGGCCTTmUT       |
| 2 | PPM1D_exon1_c_R | PPM1D | exon1   | TCGGCATTCTGCTGAACCGCTCTCCGATC<br>TCAAACAAGCCAGGGAActmAC     |
| 2 | PPM1D_exon3_F   | PPM1D | exon3   | ACACTCTTTCCTACACGACGCTCTCCGAT<br>CTACTGAGCTATCTTAGTTGTTmGT  |
| 2 | PPM1D_exon3_R   | PPM1D | exon3   | TCGGCATTCTGCTGAACCGCTCTCCGATC<br>TTGCCAAGTAAGGGTTAGTTmCT    |
| 2 | PPM1D_exon5_a_F | PPM1D | exon5   | ACACTCTTTCCTACACGACGCTCTCCGAT<br>CTACAGATGTAGTGGCAGCTAAmAT  |
| 2 | PPM1D_exon5_a_R | PPM1D | exon5   | TCGGCATTCTGCTGAACCGCTCTCCGATC<br>TGTATCACACAGGTTTCTTmGmAC   |
| 2 | PPM1D_exon6_a_F | PPM1D | exon6   | ACACTCTTTCCTACACGACGCTCTCCGAT<br>CTTGCATAGATTTGTTGAGTTCTmGG |
| 2 | PPM1D_exon6_a_R | PPM1D | exon6   | TCGGCATTCTGCTGAACCGCTCTCCGATC<br>TTGGAAGGCTATTATTCAAAGAAmCA |
| 2 | PPM1D_exon6_c_F | PPM1D | exon6   | ACACTCTTTCCTACACGACGCTCTCCGAT<br>CTTTAGAAGAGTCCAATTCTGGmCC  |
| 2 | PPM1D_exon6_c_R | PPM1D | exon6   | TCGGCATTCTGCTGAACCGCTCTCCGATC<br>TTCAACATCGGCACCAAATTTmAA   |
| 2 | TP53_exon1_F    | TP53  | exon1   | ACACTCTTTCCTACACGACGCTCTCCGAT<br>CTTTCAAAGACCCAAAACCCAAmAA  |
| 2 | TP53_exon1_R    | TP53  | exon1   | TCGGCATTCTGCTGAACCGCTCTCCGATC<br>TTTGATTTGAATTCCTGTTmCC     |
| 2 | TP53_exon10_a_F | TP53  | exon10  | ACACTCTTTCCTACACGACGCTCTCCGAT<br>CTATTGAAGTCTCATGGAAGCCmAG  |
| 2 | TP53_exon10_a_R | TP53  | exon10  | TCGGCATTCTGCTGAACCGCTCTCCGATC<br>TCGGACGATATTGAACAATGGmUT   |
| 2 | TP53_exon10_b_F | TP53  | exon10  | ACACTCTTTCCTACACGACGCTCTCCGAT<br>CTGAAGGGACAGAAGATGACAmGG   |
| 2 | TP53_exon10_b_R | TP53  | exon10  | TCGGCATTCTGCTGAACCGCTCTCCGATC<br>TGACTGCTCTTTTCAACCATmUA    |
| 2 | TP53_exon11_F   | TP53  | exon11  | ACACTCTTTCCTACACGACGCTCTCCGAT<br>CTGGACTGTAGATGGGTGAAAAmGA  |
| 2 | TP53_exon11_R   | TP53  | exon11  | TCGGCATTCTGCTGAACCGCTCTCCGATC<br>TAGACCTATGGAACTGTGAGmUG    |
| 2 | TP53_exon12_F   | TP53  | exon12  | ACACTCTTTCCTACACGACGCTCTCCGAT<br>CTAACGTTGTTTTAGGAAGTmUG    |

|   |                 |       |        |                                                            |
|---|-----------------|-------|--------|------------------------------------------------------------|
| 2 | TP53_exon2_F    | TP53  | exon2  | ACACTCTTTCCTACACGACGCTCTCCGAT<br>CTTGAGAATGGAATCCTATGGCmUT |
| 2 | TP53_exon2_R    | TP53  | exon2  | TCGGCATTCTGCTGAACCGCTCTCCGATC<br>TCATGTTGCTTTGTACCGTcmAT   |
| 2 | TP53_exon3_F    | TP53  | exon3  | ACACTCTTTCCTACACGACGCTCTCCGAT<br>CTGGCTAGGCTAAGCTATGATGmUT |
| 2 | TP53_exon3_R    | TP53  | exon3  | TCGGCATTCTGCTGAACCGCTCTCCGATC<br>TGCTCCTGGTTGTAGCTAACTmAA  |
| 2 | TP53_exon5_F    | TP53  | exon5  | ACACTCTTTCCTACACGACGCTCTCCGAT<br>CTTTTCCACTTGATAAGAGGTcmCC |
| 2 | TP53_exon5_R    | TP53  | exon5  | TCGGCATTCTGCTGAACCGCTCTCCGATC<br>TGAAGAGAATCTCCGCAAGAAmAG  |
| 2 | TP53_exon7_F    | TP53  | exon7  | ACACTCTTTCCTACACGACGCTCTCCGAT<br>CTGAGAGGTGGATGGGTAGTAGmUA |
| 2 | TP53_exon7_R    | TP53  | exon7  | TCGGCATTCTGCTGAACCGCTCTCCGATC<br>TATCTTGGGCCTGTGTATcmUC    |
| 2 | TP53_exon9_F    | TP53  | exon9  | ACACTCTTTCCTACACGACGCTCTCCGAT<br>CTAATCAGTGAGGAATCAGAGmGC  |
| 2 | TP53_exon9_R    | TP53  | exon9  | TCGGCATTCTGCTGAACCGCTCTCCGATC<br>TTTTCAACTCTGTCTCTCCmUC    |
| 3 | PPM1D_exon1_b_F | PPM1D | exon1  | ACACTCTTTCCTACACGACGCTCTCCGAT<br>CTAACCGACGGCTGAAGAAmAA    |
| 3 | PPM1D_exon1_b_R | PPM1D | exon1  | TCGGCATTCTGCTGAACCGCTCTCCGATC<br>TCTTCTTGATGAAACCCACAmAG   |
| 3 | PPM1D_exon2_F   | PPM1D | exon2  | ACACTCTTTCCTACACGACGCTCTCCGAT<br>CTACTTGCAAGAGTGAATATTmUT  |
| 3 | PPM1D_exon2_R   | PPM1D | exon2  | TCGGCATTCTGCTGAACCGCTCTCCGATC<br>TGAAAGAGAAAACGACAGAATmGT  |
| 3 | PPM1D_exon4_F   | PPM1D | exon4  | ACACTCTTTCCTACACGACGCTCTCCGAT<br>CTGCTTCCAATAACTTCTGmCT    |
| 3 | PPM1D_exon4_R   | PPM1D | exon4  | TCGGCATTCTGCTGAACCGCTCTCCGATC<br>TACCAAAACAATGTTTAGACAmAC  |
| 3 | PPM1D_exon5_b_F | PPM1D | exon5  | ACACTCTTTCCTACACGACGCTCTCCGAT<br>CTAGTGCCATAGTAATCTGCATmCT |
| 3 | PPM1D_exon5_b_R | PPM1D | exon5  | TCGGCATTCTGCTGAACCGCTCTCCGATC<br>TTCGAGTTCAAATCCAAAATCCmUG |
| 3 | PPM1D_exon6_b_F | PPM1D | exon6  | ACACTCTTTCCTACACGACGCTCTCCGAT<br>CTTACCCTCAAAGATCCAGAAmCC  |
| 3 | PPM1D_exon6_b_R | PPM1D | exon6  | TCGGCATTCTGCTGAACCGCTCTCCGATC<br>TTCGACTTAAGCCATTTCTGmUA   |
| 3 | TP53_exon12_R   | TP53  | exon12 | TCGGCATTCTGCTGAACCGCTCTCCGATC<br>TGGATCCCCACTTTCTCTmUG     |
| 3 | TP53_exon4_F    | TP53  | exon4  | ACACTCTTTCCTACACGACGCTCTCCGAT<br>CTTCAGGCAAAGTCATAGAACCmAT |
| 3 | TP53_exon4_R    | TP53  | exon4  | TCGGCATTCTGCTGAACCGCTCTCCGATC<br>TTGACTGTTTTACCTGCAATTmGG  |
| 3 | TP53_exon6_F    | TP53  | exon6  | ACACTCTTTCCTACACGACGCTCTCCGAT<br>CTAGAGGCAAGGAAAGGTGATAmAA |
| 3 | TP53_exon6_R    | TP53  | exon6  | TCGGCATTCTGCTGAACCGCTCTCCGATC<br>TTAGGACCTGATTTCTTACTmGC   |
| 3 | TP53_exon8_F    | TP53  | exon8  | ACACTCTTTCCTACACGACGCTCTCCGAT<br>CTTTGCACATCTCATGGGTTAmUA  |
| 3 | TP53_exon8_R    | TP53  | exon8  | TCGGCATTCTGCTGAACCGCTCTCCGATC<br>TTGATTCTCACTGATTGCTcmUT   |

Nucleotide sequences for multiplexed primers used in plexes 1 - 3.

\* Consecutive primers constitute forward (F) and reverse (R) primer pairs for the indicated loci

† Forward primers format: 5' ACACTCTTCCCTACACGACGCTCTCCGATCT-[gene-specific forward] 3',  
Reverse primer format: 5' TCGGCATTCTGCTGAACCGCTCTCCGATCT-[gene-specific reverse] 3'

‡ "m" denotes a single 2'-O-Methyl base in place of the DNA base, used in order to minimise potential primer dimers
